## OPINION

# Missing in action: The UN Water Action Agenda needs an overhauled commitment-setting process

Ryan Cronk<sup>1\*</sup>, Clarissa Brocklehurst<sup>1</sup>, Barbara Evans<sup>2</sup>, Laura Gomez Rodriguez<sup>1</sup>, Daniele Lantagne<sup>3,4</sup>, Cameron Mcbroom-Fitterer<sup>1</sup>, Eric Momanyi<sup>5</sup>, Kwabena Nyarko<sup>6</sup>, Cecilia Scharp<sup>7</sup>

**1** The Water Institute, University of North Carolina at Chapel Hill, Chapel Hill, North Carolina, United States of America, **2** School of Civil Engineering, University of Leeds, Leeds, United Kingdom, **3** Department of Civil and Environmental Engineering, Tufts University, Medford, Massachusetts, United States of America, **4** Friedman School of Nutrition, Tufts University, Boston, Massachusetts, United States of America, **5** Bill & Melinda Gates Foundation, Seattle, Washington, United States of America, **6** Department of Civil Engineering, Kwame Nkrumah University of Science and Technology, Kumasi, Ghana, **7** UNICEF, New York City, New York, United States of America

\* [rcronk@live.unc.edu](mailto:rcronk@live.unc.edu)

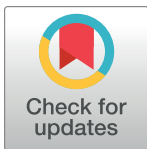

In March 2023, the United Nations (UN) held the first water conference since 1977. The UN 2023 Water Conference brought together more than 3000 representatives from UN Member States, intergovernmental organizations, UN entities, civil society (including international and national non-governmental organizations), and academia. The conference aimed to “unite the world for water” around the building blocks of “commitment to action, sustained and scalable implementation, and follow-up and review processes” [1]. This conference was timely, given the inextricable link between water and the fortunes of nations and the impacts of climate change, conflict, and pandemics. UN Member States and other stakeholders were invited to make voluntary commitments to catalyze action. These commitments would form the Water Action Agenda (WAA), designed to accelerate progress in the Water Action Decade (2018–2028) and the Sustainable Development Goal (SDG) period (2015–2030) [2].

The intention and ambition are compelling. But did the conference and the WAA hit the mark? Did UN Member States and stakeholders rise to the challenge? Were commitments a bold response to pressing climate, economic, geopolitical, and health challenges of the 21<sup>st</sup> century? Are water stakeholders committed to the right mix of systems strengthening, infrastructure investment, workforce capacity development, and resilience to ensure governments finally achieve the “internationally agreed water-related goals and targets, including those contained in the 2030 Agenda for Sustainable Development” [1]?

After the conference, commentators criticized the effectiveness of the WAA [3]. The Water Institute at UNC obtained access to a dataset of 764 commitments (91% of the 837 ultimately made as part of the WAA) [2]. The Water Institute analyzed these commitments to seek answers to the questions above. Of the analyzed commitments, the largest proportion (39%) were made by non-governmental organizations (NGOs). UN agencies made 6% of commitments, academic institutions made 8%, and the private sector made 9%. Only 187 (24%) were created by UN Member States. Of these, 135 (18%) were “domestic commitments” (we defined as commitments made by governments to be implemented in their own country), and only 73 (10%) were created by low- and middle-income countries (LMICs). Fifty-four Member States made commitments, representing 28% of the 194 UN countries. It is striking that at a

## OPEN ACCESS

**Citation:** Cronk R, Brocklehurst C, Evans B, Gomez Rodriguez L, Lantagne D, Mcbroom-Fitterer C, et al. (2024) Missing in action: The UN Water Action Agenda needs an overhauled commitment-setting process. *PLOS Water* 3(7): e0000251. <https://doi.org/10.1371/journal.pwat.0000251>

**Editor:** Guillaume Wright, PLOS: Public Library of Science, UNITED KINGDOM

**Published:** July 11, 2024

**Copyright:** © 2024 Cronk et al. This is an open access article distributed under the terms of the [Creative Commons Attribution License](https://creativecommons.org/licenses/by/4.0/), which permits unrestricted use, distribution, and reproduction in any medium, provided the original author and source are credited.

**Funding:** The authors received no specific funding for this work.

**Competing interests:** The authors have declared that no competing interests exist.

conference primarily designed to rally UN Member States, only a quarter felt compelled to make commitments. Notably, only 33 LMICs did, representing 17% of LMICs that are UN members.

Of the 73 domestic commitments made by LMICs, 7% were assessed to be measurable, time-bound, linked to monitoring and evaluation efforts, and aligned with existing policies and plans. Less than half (47%) addressed sanitation; only 8% specifically focused on hygiene.

These findings suggest that the commitment-making process was of little interest to governments. There were substantial challenges with the methodological development of the commitments, where few commitments met “SMART” (specific, measurable, attainable, relevant, time-bound) criteria, and few were linked with monitoring systems and existing policies and plans. The commitments were poorly connected. There were expectations of mutual accountability that were not met, and the sheer number of commitments and their varying quality made turning them into a true “action agenda” nearly impossible.

One silver lining, however, is that LMIC governments that set commitments indicated that they were committing to improving policies, institutions, and regulations, that is, to strengthening systems rather than focusing solely on infrastructure. How can water sector actors, including donors, academia, and civil society, support countries in these efforts?

### **Capturing successful learning from the local context**

There is a need to identify local barriers and solutions to improving policy, institutions, and regulations and to build an evidence base on doing these well. While randomized controlled trials are often described as the research gold standard, little evidence is generated using alternative study designs exploring policy, institutions, and regulations. These are desperately needed and align with ongoing discussions advocating systems approaches [4–6]. Success stories and case studies are valuable in informing governments about what works and what doesn't. We know this can be done—there is a long track record in the health sector of systems strengthening [7]. However, this is relatively new in the water, sanitation, and hygiene (WASH) sector and has substantial challenges compared to the health sector, given that no countries have a dedicated executive or ministerial structure dedicated to WASH.

### **Strengthening an open platform for sharing information and ideas**

We encourage the UN-Water Global Analysis and Assessment of Sanitation and Drinking Water (GLAAS) to continue to expand the compilation of case studies and for broad use of these resources in the sector [8–10]. Local evidence is essential for cross-pollination across countries so that approaches can be adapted for success in different contexts.

### **Sharing case examples through learning partnerships**

An open platform for case studies would be best facilitated and distributed through learning partnerships, such as the Sanitation and Water for All (SWA) alliance (6). Learning partnerships will function best if they link various actor types and help translate evidence appropriately (i.e., span boundaries between actor types) [11]. Evidence cannot simply exist as a digital database but must be accessible and synthesized by partners into digestible, relevant advice for policymakers and practitioners. This will only be successful if cultural competency (working effectively with others in cross-cultural situations) and accessibility of evidence products are considered.

## Enhancing training and capacity building

Development partners need to build the capacity of local actors—think tanks, civil society, academics, and policymakers—to advocate for change and act upon it when it happens. They must collaborate with and work through these local actors.

The commitment formulating process must improve for this support to translate into more meaningful action. Support systems are needed to enable national and local governments to review practical evidence, identify opportunities for improvement, craft ways to improve policy, institutions, and regulations, and establish sustainable infrastructure. The international community has an opportunity to support governments in formulating SMART commitments backed by evidence, matched by complementary commitments from donors, academia, and civil society, and that allow meaningful progress tracking.

A better system for supporting countries to formulate commitments is essential if future additions to the WAA are to be made. Only then can the WAA ultimately contribute to national and global goals and targets in the water sector.

## Acknowledgments

We thank the Water Institute at UNC for hosting a plenary panel, “The 2023 UN Water Conference: Supporting Commitments with Evidence,” at the 2023 UNC Water and Health Conference, which inspired this opinion article. The session recording is available online: <https://www.youtube.com/watch?v=83DRTi7bsag>.

## Author Contributions

**Conceptualization:** Ryan Cronk, Clarissa Brocklehurst, Barbara Evans, Laura Gomez Rodriguez, Daniele Lantagne, Cameron Mcbroom-Fitterer, Eric Momanyi, Kwabena Nyarko, Cecilia Scharp.

**Writing – original draft:** Ryan Cronk, Clarissa Brocklehurst.

**Writing – review & editing:** Ryan Cronk, Clarissa Brocklehurst, Barbara Evans, Laura Gomez Rodriguez, Daniele Lantagne, Cameron Mcbroom-Fitterer, Eric Momanyi, Kwabena Nyarko, Cecilia Scharp.

## References

1. About the conference | Department of Economic and Social Affairs. [cited 15 Feb 2024]. <https://sdgs.un.org/conferences/water2023/about>.
2. Water Action Agenda | Sustainable Development. [cited 15 Feb 2024]. <https://sdgs.un.org/partnerships/action-networks/water>.
3. Iceland C, Black C. UN Water Conference 2023: Not Enough Game-changing Commitments. 2023 [cited 26 Feb 2024]. <https://www.wri.org/insights/un-water-conference-2023-needed-outcomes>.
4. Setty K, Cronk R, George S, Anderson D, O’Flaherty G, Bartram J. Adapting Translational Research Methods to Water, Sanitation, and Hygiene. *Int J Environ Res Public Health*. 2019; 16: 4049. <https://doi.org/10.3390/ijerph16204049> PMID: 31652610
5. Haque SS, Freeman MC. The Applications of Implementation Science in Water, Sanitation, and Hygiene (WASH) Research and Practice. *Environ Health Perspect*. 2021; 129: 65002. <https://doi.org/10.1289/EHP7762> PMID: 34132602
6. Valcourt N, Javernick-Will A, Walters J, Linden K. System Approaches to Water, Sanitation, and Hygiene: A Systematic Literature Review. *Int J Environ Res Public Health*. 2020; 17: 702. <https://doi.org/10.3390/ijerph17030702> PMID: 31973179
7. Balabanova D, Mills A, Conteh L, Akkazieva B, Banteyerga H, Dash U, et al. Good Health at Low Cost 25 years on: lessons for the future of health systems strengthening. *The Lancet*. 2013; 381: 2118–2133. [https://doi.org/10.1016/S0140-6736\(12\)62000-5](https://doi.org/10.1016/S0140-6736(12)62000-5) PMID: 23574803

8. WHO. Strong systems and sound investments: evidence on and key insights into accelerating progress on sanitation, drinking-water and hygiene: UN-Water global analysis and assessment of sanitation and drinking-water (GLAAS) 2022 report. World Health Organization; 2023 Jan.
9. GLAAS data portal. In: GLAAS Data Platform [Internet]. [cited 15 Feb 2024]. <https://glaas.who.int>.
10. A global partnership to achieve universal access to clean water and adequate sanitation | Sanitation and Water for All (SWA). 30 Jan 2020 [cited 15 Feb 2024]. <https://www.sanitationandwaterforall.org/>.
11. Cash DW, Clark WC, Alcock F, Dickson NM, Eckley N, Guston DH, et al. Knowledge systems for sustainable development. *Proc Natl Acad Sci*. 2003; 100: 8086–8091. <https://doi.org/10.1073/pnas.1231332100> PMID: 12777623
